# Supplementary material for: Water pumping in mantle shear zones
Source: PubMed Central journal article supplement (PMC5472755; doi:10.1038/ncomms15736), 2017-06-08
Supplement: ncomms15736-s1.pdf [file ncomms15736-s1.pdf]

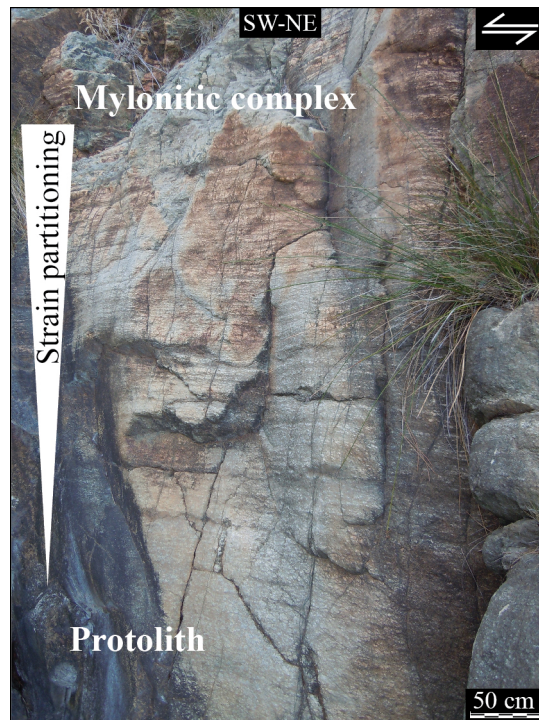

**Supplementary Figure 1 | Strain partitioning at the edge of mylonitic complexes.** From the protolith to the mylonitic complexes, the strain partitioning between the protomylonite layers (dark) and the mylonite layers (bright) progressively strengthens.

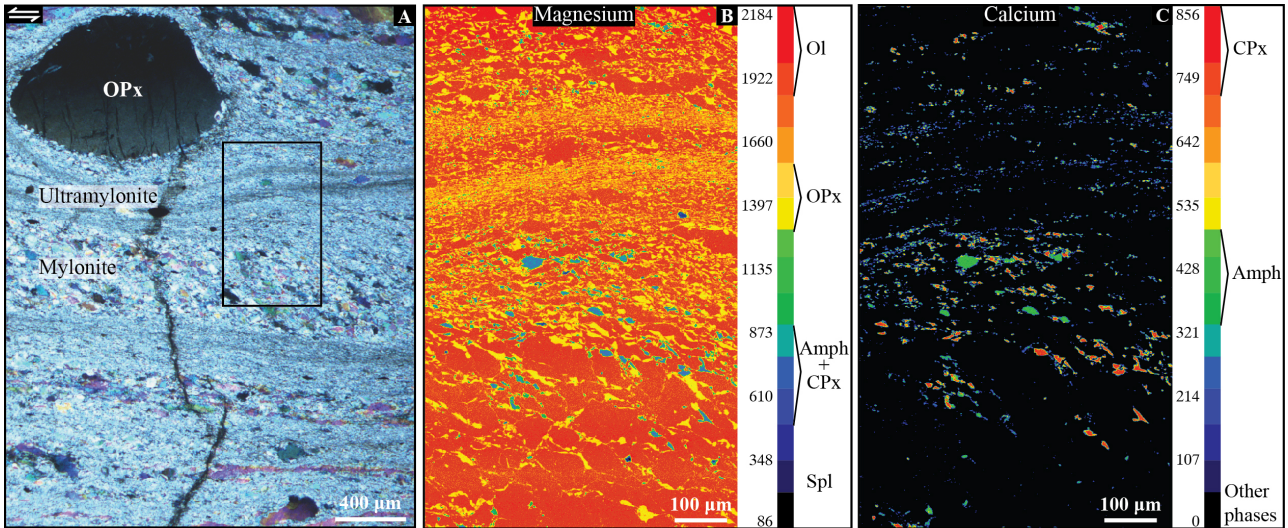

**Supplementary Figure 2 | Element maps across ultramylonite layers.** **A)** Thin section (polarized light) of a mylonitic peridotite, including ultramylonites. **B)** Distribution of magnesium (microprobe) across (ultra)mylonitic layers. Location in supplementary figure 2A. The colour coding refers to point counting. The step size is 0.8 µm and the analytical conditions are 15 kV and 10 nA on polished thin section (diamond paste of 1 µm). Ol = olivine; Amph = amphibole; CPx = clinopyroxene; Spl = Spinel. **C)** Distribution of calcium across the same area. This map highlights an enrichment in amphibole nearby ultramylonite layers. OPx = orthopyroxene.

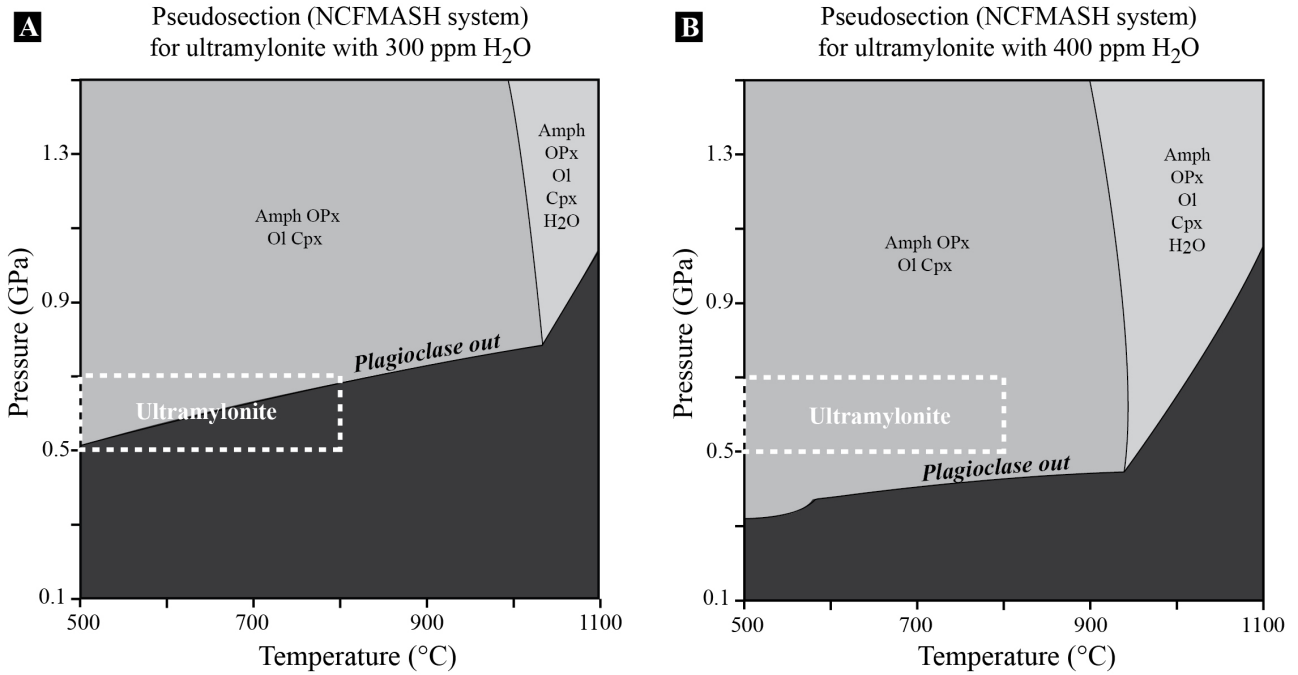

**Supplementary Figure 3 | Equilibrium phase diagrams (pseudosections) for ultramylonites. A)** Pseudosection with 300 ppm H<sub>2</sub>O. **B)** Pseudosection with 400 ppm H<sub>2</sub>O. The pseudosections were produced using *Perple\_X* calculations in the NCFMASH (Na<sub>2</sub>O-CaO-FeO-MgO-Al<sub>2</sub>O<sub>3</sub>-SiO<sub>2</sub>-H<sub>2</sub>O) chemical system, and based on the modal proportions that include olivine (65.9%), orthopyroxene (28.8%), amphibole (3.0%), clinopyroxene (1.5%) and spinel (0.8%). For comparison, we show the calculated conditions of deformation for the ultramylonites (dotted white rectangle). Based on the absence of plagioclase in the Ronda shear zones, our *Perple\_X* calculations indicate a minimum of ~400 ppm H<sub>2</sub>O in the ultramylonite layers. Amph = amphibole; OPx = orthopyroxene; Ol = Olivine; CPx = clinopyroxene.

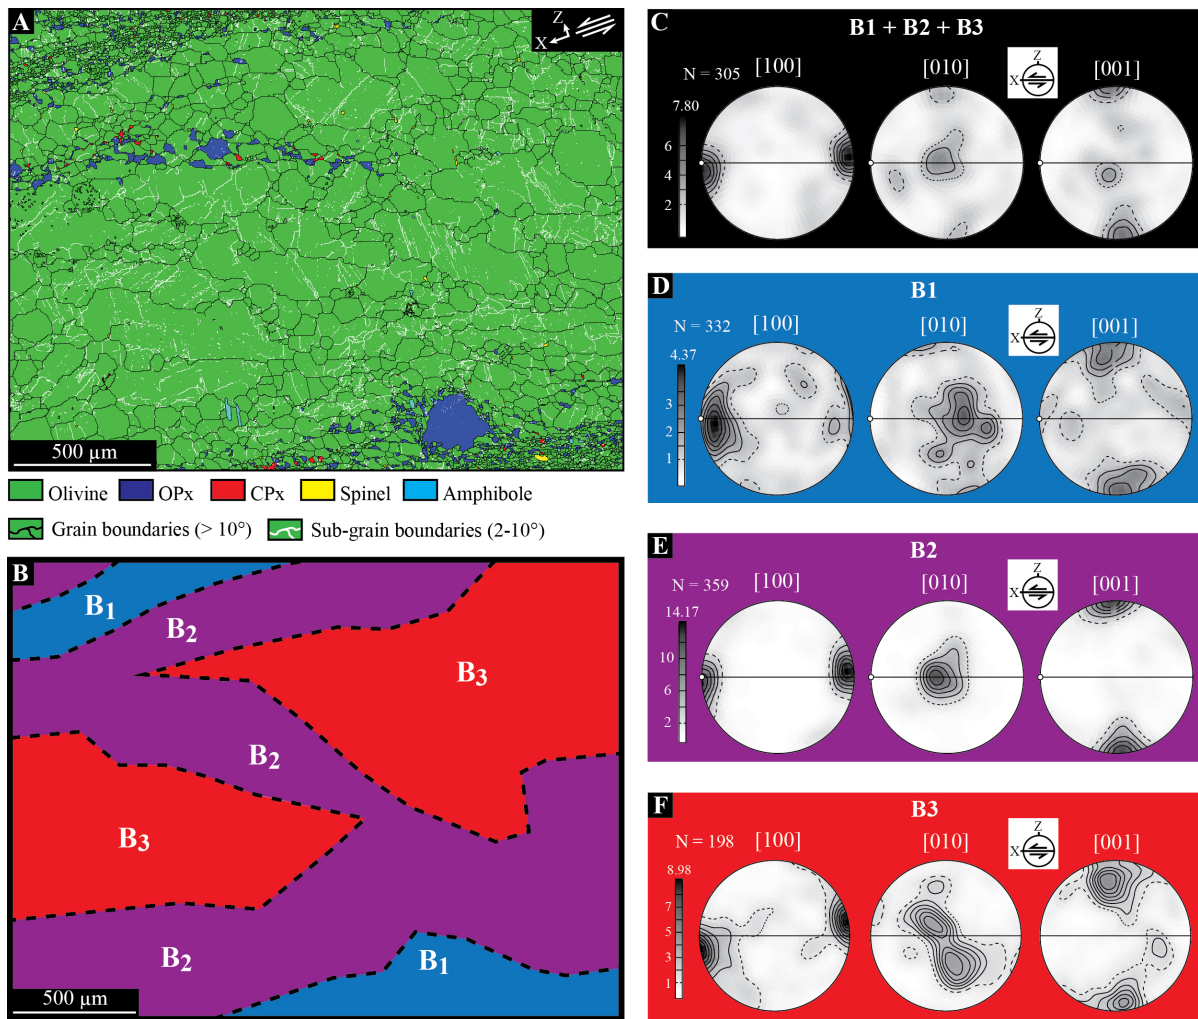

**Supplementary Figure 4 | Phase distribution and olivine fabric between ultramylonites.** **A)** EBSD map (phases) of the mylonitic layer shown in figure 5A of the paper. The step size is 1  $\mu\text{m}$  and the analytical conditions are described in the methods section of the paper. While grain boundaries (black lines) are defined by correlated misorientation angles of more than  $10^\circ$ , the lattice tilt boundaries (white lines) are defined by correlated misorientation angles between  $2^\circ$  and  $10^\circ$ . X = shear direction; Z = pole to the shear plane. The black points within grains are non-indexed points. **B)** Sketch of the different areas highlighted in figure 5A of the paper and based on the olivine LPO distribution, including ultramylonites (B1), connected bands of strong LPO in the mylonite (B2), and isolated areas of moderate LPO between the ultramylonites (B3). **From C to F)** Olivine LPOs for each area, including the whole map (C), B1 area (D), B2 area (E) and B3 area (F). The three orthorhombic axes for olivine ([100], [010] and [001]) are shown in lower-hemisphere pole figures with respect to the shear plane (horizontal line) and shear direction (white dot). The iso-contours and grey shading (linear scale) are multiples of a uniform distribution. They were constructed using a Gaussian half-width angle of  $10^\circ$  and based on one point per grain. N = number of grains; OPx = orthopyroxene; CPx = clinopyroxene.



**Supplementary Table 1** | Major-element compositions (in weight percent) and grain size of olivine (Ol) grains in the mylonites and ultramylonites. Por = porphyroclasts.

| Oxides (%)                     | Ol <sub>1</sub> | Ol <sub>2</sub> | Ol <sub>3</sub> | Ol <sub>4</sub> | Ol <sub>5</sub> | Ol <sub>6</sub> | Ol <sub>7</sub> | Ol <sub>8</sub> | Ol <sub>9</sub> | Ol <sub>10</sub> | Ol <sub>11</sub> | Ol <sub>12</sub> |
|--------------------------------|-----------------|-----------------|-----------------|-----------------|-----------------|-----------------|-----------------|-----------------|-----------------|------------------|------------------|------------------|
| SiO <sub>2</sub>               | 40.86           | 40.96           | 41.11           | 41.00           | 41.03           | 41.13           | 41.2            | 40.85           | 40.38           | 40.80            | 40.91            | 40.89            |
| TiO <sub>2</sub>               | 0.00            | 0.00            | 0.00            | 0.00            | 0.00            | 0.00            | 0.00            | 0.00            | 0.00            | 0.00             | 0.00             | 0.00             |
| Al <sub>2</sub> O <sub>3</sub> | 0.00            | 0.00            | 0.00            | 0.00            | 0.00            | 0.00            | 0.00            | 0.00            | 0.00            | 0.00             | 0.00             | 0.00             |
| Cr <sub>2</sub> O <sub>3</sub> | 0.00            | 0.03            | 0.01            | 0.01            | 0.01            | 0.00            | 0.00            | 0.00            | 0.00            | 0.00             | 0.00             | 0.01             |
| FeO                            | 8.03            | 7.82            | 7.69            | 7.80            | 8.39            | 8.30            | 8.25            | 8.34            | 8.19            | 7.95             | 7.96             | 7.79             |
| MnO                            | 0.12            | 0.12            | 0.11            | 0.12            | 0.13            | 0.13            | 0.12            | 0.13            | 0.12            | 0.12             | 0.12             | 0.12             |
| MgO                            | 50.32           | 50.32           | 50.31           | 50.16           | 50.32           | 50.72           | 50.65           | 50.51           | 50.66           | 50.87            | 50.59            | 51.36            |
| CaO                            | 0.02            | 0.03            | 0.06            | 0.02            | 0.00            | 0.00            | 0.01            | 0.02            | 0.00            | 0.00             | 0.02             | 0.00             |
| Na <sub>2</sub> O              | 0.00            | 0.00            | 0.00            | 0.00            | 0.00            | 0.00            | 0.00            | 0.01            | 0.00            | 0.00             | 0.00             | 0.00             |
| NiO                            | 0.40            | 0.40            | 0.41            | 0.38            | 0.38            | 0.39            | 0.40            | 0.40            | 0.39            | 0.40             | 0.40             | 0.39             |
| <b>Total</b>                   | 99.75           | 99.66           | 99.69           | 99.50           | 100.3           | 100.7           | 100.7           | 100.3           | 99.74           | 100.1            | 100.0            | 100.6            |
| <b>Grain size (µm)</b>         | 250             | 40              | 25              | 25              | 80              | 60              | 300             | 400             | Por             | Por              | Por              | 10               |

  

| Oxides (%)                     | Ol <sub>13</sub> | Ol <sub>14</sub> | Ol <sub>15</sub> | Ol <sub>16</sub> | Ol <sub>17</sub> | Ol <sub>18</sub> | Ol <sub>19</sub> | Ol <sub>20</sub> | Ol <sub>21</sub> | Ol <sub>22</sub> |
|--------------------------------|------------------|------------------|------------------|------------------|------------------|------------------|------------------|------------------|------------------|------------------|
| SiO <sub>2</sub>               | 40.88            | 41.47            | 41.28            | 41.12            | 41.21            | 41.15            | 40.92            | 41.21            | 41.10            | 40.92            |
| TiO <sub>2</sub>               | 0.00             | 0.00             | 0.00             | 0.00             | 0.00             | 0.00             | 0.00             | 0.00             | 0.00             | 0.00             |
| Al <sub>2</sub> O <sub>3</sub> | 0.00             | 0.00             | 0.00             | 0.00             | 0.00             | 0.00             | 0.00             | 0.00             | 0.00             | 0.00             |
| Cr <sub>2</sub> O <sub>3</sub> | 0.00             | 0.03             | 0.02             | 0.00             | 0.01             | 0.01             | 0.00             | 0.21             | 0.00             | 0.00             |
| FeO                            | 7.78             | 7.11             | 7.44             | 8.13             | 8.08             | 7.91             | 8.06             | 7.75             | 7.71             | 8.06             |
| MnO                            | 0.11             | 0.11             | 0.11             | 0.12             | 0.12             | 0.12             | 0.12             | 0.13             | 0.11             | 0.12             |
| MgO                            | 51.48            | 50.85            | 50.48            | 50.94            | 51.15            | 50.48            | 50.39            | 50.49            | 50.43            | 50.39            |
| CaO                            | 0.00             | 0.03             | 0.05             | 0.01             | 0.01             | 0.14             | 0.01             | 0.01             | 0.01             | 0.01             |
| Na <sub>2</sub> O              | 0.00             | 0.00             | 0.00             | 0.00             | 0.00             | 0.00             | 0.00             | 0.01             | 0.00             | 0.00             |
| NiO                            | 0.41             | 0.43             | 0.39             | 0.40             | 0.42             | 0.39             | 0.40             | 0.39             | 0.42             | 0.4              |
| <b>Total</b>                   | 100.7            | 100.0            | 99.77            | 100.7            | 101.0            | 100.2            | 99.90            | 100.2            | 99.77            | 100.0            |
| <b>Grain size (µm)</b>         | 10               | 100              | 80               | 150              | 80               | 30               | 200              | 30               | 100              | 200              |

**Supplementary Table 2** | Major-element compositions (oxides in weight percent) and grain size of enstatite

(En) grains in the mylonites and ultramylonites. Por = porphyroclasts.

| Oxides                         | En <sub>1</sub>  | En <sub>2</sub>  | En <sub>3</sub>  | En <sub>4</sub>  | En <sub>5</sub>  | En <sub>6</sub>  | En <sub>7</sub>  | En <sub>8</sub>  | En <sub>9</sub>  | En <sub>10</sub> | En <sub>11</sub> | En <sub>12</sub> |
|--------------------------------|------------------|------------------|------------------|------------------|------------------|------------------|------------------|------------------|------------------|------------------|------------------|------------------|
| SiO <sub>2</sub>               | 55.43            | 55.84            | 55.68            | 55.54            | 56.00            | 55.80            | 56.59            | 56.70            | 56.63            | 55.47            | 55.91            | 57.57            |
| TiO <sub>2</sub>               | 0.01             | 0.01             | 0.02             | 0.00             | 0.00             | 0.01             | 0.02             | 0.00             | 0.01             | 0.00             | 0.01             | 0.00             |
| Al <sub>2</sub> O <sub>3</sub> | 2.20             | 1.70             | 1.79             | 2.03             | 1.39             | 1.35             | 1.01             | 0.54             | 0.50             | 0.54             | 1.97             | 0.13             |
| Cr <sub>2</sub> O <sub>3</sub> | 0.71             | 0.48             | 0.56             | 0.61             | 0.27             | 0.27             | 0.16             | 0.04             | 0.07             | 0.09             | 0.75             | 0.05             |
| FeO                            | 5.49             | 5.61             | 5.52             | 5.71             | 5.62             | 5.62             | 5.62             | 5.69             | 5.30             | 5.85             | 5.41             | 5.55             |
| MnO                            | 0.13             | 0.14             | 0.15             | 0.15             | 0.14             | 0.14             | 0.14             | 0.12             | 0.12             | 0.12             | 0.14             | 0.14             |
| MgO                            | 34.34            | 34.81            | 34.90            | 34.91            | 35.25            | 35.25            | 35.51            | 35.73            | 36.07            | 37.10            | 34.89            | 36.00            |
| CaO                            | 1.05             | 0.71             | 0.54             | 0.55             | 0.51             | 0.53             | 0.33             | 0.27             | 0.24             | 0.26             | 0.51             | 0.09             |
| Na <sub>2</sub> O              | 0.03             | 0.02             | 0.02             | 0.02             | 0.03             | 0.01             | 0.00             | 0.00             | 0.02             | 0.00             | 0.00             | 0.00             |
| K <sub>2</sub> O               | 0.00             | 0.01             | 0.00             | 0.00             | 0.00             | 0.00             | 0.01             | 0.00             | 0.00             | 0.00             | 0.00             | 0.00             |
| <b>Total</b>                   | <b>99.39</b>     | <b>99.33</b>     | <b>99.16</b>     | <b>99.52</b>     | <b>99.20</b>     | <b>98.99</b>     | <b>99.38</b>     | <b>99.09</b>     | <b>98.95</b>     | <b>99.45</b>     | <b>99.59</b>     | <b>99.53</b>     |
| <b>Grain size (µm)</b>         | Por (rim)        | Por (core)       | Por (rim)        | Por (core)       | 30               | 20               | 20               | 40               | 5                | 5                | Por (core)       | Por (rim)        |
| Oxides                         | En <sub>13</sub> | En <sub>14</sub> | En <sub>15</sub> | En <sub>16</sub> | En <sub>17</sub> | En <sub>18</sub> | En <sub>19</sub> | En <sub>20</sub> | En <sub>21</sub> | En <sub>22</sub> | En <sub>23</sub> | En <sub>24</sub> |
| SiO <sub>2</sub>               | 56.82            | 57.39            | 57.77            | 56.44            | 56.66            | 57.06            | 56.64            | 56.34            | 56.66            | 57.14            | 56.78            | 56.92            |
| TiO <sub>2</sub>               | 0.01             | 0.00             | 0.02             | 0.00             | 0.02             | 0.01             | 0.01             | 0.02             | 0.02             | 0.01             | 0.01             | 0.00             |
| Al <sub>2</sub> O <sub>3</sub> | 0.17             | 0.24             | 0.14             | 0.85             | 1.39             | 0.55             | 1.01             | 0.83             | 1.05             | 0.55             | 0.95             | 1.84             |
| Cr <sub>2</sub> O <sub>3</sub> | 0.03             | 0.04             | 0.05             | 0.16             | 0.30             | 0.08             | 0.15             | 0.12             | 0.17             | 0.09             | 0.14             | 0.80             |
| FeO                            | 5.73             | 5.80             | 5.76             | 5.96             | 5.66             | 5.45             | 5.57             | 5.86             | 5.64             | 5.57             | 5.61             | 5.67             |
| MnO                            | 0.14             | 0.13             | 0.15             | 0.15             | 0.13             | 0.12             | 0.13             | 0.14             | 0.15             | 0.16             | 0.14             | 0.16             |
| MgO                            | 36.94            | 36.00            | 36.19            | 36.41            | 35.42            | 35.98            | 35.34            | 36.03            | 35.56            | 35.79            | 35.68            | 33.71            |
| CaO                            | 0.06             | 0.08             | 0.09             | 0.27             | 0.40             | 0.28             | 0.39             | 0.33             | 0.47             | 0.30             | 0.31             | 0.49             |
| Na <sub>2</sub> O              | 0.00             | 0.00             | 0.00             | 0.00             | 0.00             | 0.00             | 0.01             | 0.04             | 0.00             | 0.00             | 0.01             | 0.02             |
| K <sub>2</sub> O               | 0.00             | 0.00             | 0.00             | 0.00             | 0.00             | 0.00             | 0.00             | 0.01             | 0.00             | 0.00             | 0.01             | 0.00             |
| <b>Total</b>                   | <b>99.89</b>     | <b>99.66</b>     | <b>100.16</b>    | <b>100.23</b>    | <b>99.99</b>     | <b>99.51</b>     | <b>99.26</b>     | <b>99.70</b>     | <b>99.72</b>     | <b>99.61</b>     | <b>99.65</b>     | <b>99.59</b>     |
| <b>Grain size (µm)</b>         | 10               | 15               | 10               | 8                | 40               | 10               | 20               | 10               | 50               | 6                | 10               | Por (core)       |
| Oxides                         | En <sub>25</sub> | En <sub>26</sub> | En <sub>27</sub> | En <sub>28</sub> | En <sub>29</sub> | En <sub>30</sub> | En <sub>31</sub> | En <sub>32</sub> | En <sub>33</sub> | En <sub>34</sub> | En <sub>35</sub> | En <sub>36</sub> |
| SiO <sub>2</sub>               | 57.13            | 56.72            | 57.33            | 57.62            | 56.94            | 57.11            | 57.63            | 57.12            | 57.12            | 57.60            | 57.37            | 57.27            |
| TiO <sub>2</sub>               | 0.01             | 0.00             | 0.01             | 0.00             | 0.01             | 0.01             | 0.00             | 0.02             | 0.01             | 0.00             | 0.00             | 0.01             |
| Al <sub>2</sub> O <sub>3</sub> | 1.75             | 0.42             | 1.08             | 0.45             | 1.30             | 1.98             | 1.46             | 1.19             | 1.15             | 0.39             | 0.67             | 0.60             |
| Cr <sub>2</sub> O <sub>3</sub> | 0.68             | 0.03             | 0.17             | 0.07             | 0.24             | 0.81             | 0.62             | 0.19             | 0.18             | 0.04             | 0.07             | 0.05             |
| FeO                            | 5.23             | 5.34             | 5.53             | 5.55             | 5.51             | 5.62             | 5.76             | 5.50             | 5.61             | 5.45             | 5.46             | 5.80             |
| MnO                            | 0.26             | 0.13             | 0.14             | 0.14             | 0.11             | 0.15             | 0.12             | 0.13             | 0.16             | 0.13             | 0.14             | 0.13             |
| MgO                            | 33.91            | 36.10            | 35.55            | 36.00            | 35.31            | 33.68            | 34.14            | 35.48            | 35.45            | 36.15            | 35.84            | 35.82            |
| CaO                            | 0.55             | 0.65             | 0.36             | 0.28             | 0.43             | 1.07             | 0.34             | 0.42             | 0.41             | 0.29             | 0.26             | 0.25             |
| Na <sub>2</sub> O              | 0.02             | 0.01             | 0.03             | 0.00             | 0.01             | 0.04             | 0.00             | 0.02             | 0.02             | 0.02             | 0.00             | 0.03             |
| K <sub>2</sub> O               | 0.02             | 0.00             | 0.00             | 0.00             | 0.00             | 0.00             | 0.00             | 0.00             | 0.00             | 0.00             | 0.00             | 0.01             |
| <b>Total</b>                   | <b>99.55</b>     | <b>99.39</b>     | <b>100.2</b>     | <b>100.1</b>     | <b>99.85</b>     | <b>100.5</b>     | <b>100.1</b>     | <b>100.1</b>     | <b>100.1</b>     | <b>100.1</b>     | <b>99.80</b>     | <b>99.98</b>     |
| <b>Grain size (µm)</b>         | Por (core)       | 8                | 20               | 35               | 30               | Por (core)       | Por (rim)        | 30               | 15               | 20               | 15               | 10               |

**Supplementary Table 2 (continued)**

| <b>Oxides</b>                      | <b>En<sub>37</sub></b> | <b>En<sub>38</sub></b> | <b>En<sub>39</sub></b> | <b>En<sub>40</sub></b> | <b>En<sub>41</sub></b> | <b>En<sub>42</sub></b> | <b>En<sub>43</sub></b> | <b>En<sub>44</sub></b> | <b>En<sub>45</sub></b> | <b>En<sub>46</sub></b> | <b>En<sub>47</sub></b> | <b>En<sub>48</sub></b> | <b>En<sub>49</sub></b> |
|------------------------------------|------------------------|------------------------|------------------------|------------------------|------------------------|------------------------|------------------------|------------------------|------------------------|------------------------|------------------------|------------------------|------------------------|
| <b>SiO<sub>2</sub></b>             | 57.08                  | 57.49                  | 58.23                  | 55.89                  | 57.06                  | 56.70                  | 56.88                  | 55.81                  | 57.61                  | 56.70                  | 57.55                  | 57.29                  | 57.71                  |
| <b>TiO<sub>2</sub></b>             | 0.01                   | 0.05                   | 0.00                   | 0.01                   | 0.02                   | 0.01                   | 0.01                   | 0.01                   | 0.02                   | 0.02                   | 0.01                   | 0.00                   | 0.05                   |
| <b>Al<sub>2</sub>O<sub>3</sub></b> | 1.13                   | 1.44                   | 1.35                   | 0.89                   | 0.91                   | 1.33                   | 1.16                   | 0.62                   | 0.64                   | 1.02                   | 0.48                   | 1.82                   | 1.17                   |
| <b>Cr<sub>2</sub>O<sub>3</sub></b> | 0.22                   | 0.36                   | 0.31                   | 0.18                   | 0.21                   | 0.29                   | 0.22                   | 0.08                   | 0.09                   | 0.16                   | 0.05                   | 0.69                   | 0.31                   |
| <b>FeO</b>                         | 5.51                   | 5.46                   | 5.98                   | 5.72                   | 5.33                   | 5.52                   | 5.48                   | 5.73                   | 5.42                   | 5.51                   | 5.36                   | 5.85                   | 5.50                   |
| <b>MnO</b>                         | 0.14                   | 0.18                   | 0.10                   | 0.14                   | 0.11                   | 0.14                   | 0.15                   | 0.12                   | 0.14                   | 0.14                   | 0.13                   | 0.09                   | 0.26                   |
| <b>MgO</b>                         | 35.49                  | 33.97                  | 34.56                  | 36.57                  | 35.46                  | 35.20                  | 35.43                  | 35.92                  | 35.41                  | 35.13                  | 35.90                  | 33.71                  | 34.33                  |
| <b>CaO</b>                         | 0.36                   | 0.55                   | 0.61                   | 0.30                   | 0.29                   | 0.52                   | 0.39                   | 0.26                   | 0.27                   | 0.38                   | 0.21                   | 0.60                   | 0.45                   |
| <b>Na<sub>2</sub>O</b>             | 0.00                   | 0.03                   | 0.00                   | 0.00                   | 0.00                   | 0.00                   | 0.01                   | 0.02                   | 0.00                   | 0.00                   | 0.00                   | 0.02                   | 0.02                   |
| <b>NiO</b>                         | 0.00                   | 0.00                   | 0.00                   | 0.00                   | 0.00                   | 0.00                   | 0.00                   | 0.00                   | 0.00                   | 0.01                   | 0.00                   | 0.01                   | 0.00                   |
| <b>Total</b>                       | 99.95                  | 99.52                  | 101.1                  | 99.72                  | 99.39                  | 99.71                  | 99.73                  | 98.58                  | 99.59                  | 99.07                  | 99.71                  | 100.1                  | 99.90                  |
| <b>Grain size</b>                  | 10                     | Por (rim)              | Por (rim)              | 20                     | 25                     | 40                     | 40                     | 8                      | 40                     | 30                     | 20                     | Por (core)             | Por (rim)              |

**Supplementary Table 3** | Major-element compositions (oxides in weight percent) and grain size of diopside

(Di) grains in the mylonites and ultramylonites. Por = porphyroclasts.

| Oxides (%)                     | Di <sub>1</sub> | Di <sub>2</sub> | Di <sub>3</sub> | Di <sub>4</sub> | Di <sub>5</sub> | Di <sub>6</sub> | Di <sub>7</sub> | Di <sub>8</sub> | Di <sub>9</sub> | Di <sub>10</sub> | Di <sub>11</sub> | Di <sub>12</sub> |
|--------------------------------|-----------------|-----------------|-----------------|-----------------|-----------------|-----------------|-----------------|-----------------|-----------------|------------------|------------------|------------------|
| SiO <sub>2</sub>               | 54.24           | 53.95           | 53.95           | 54.26           | 53.70           | 54.24           | 53.87           | 53.57           | 53.30           | 53.95            | 54.12            | 53.44            |
| TiO <sub>2</sub>               | 0.03            | 0.03            | 0.02            | 0.02            | 0.05            | 0.01            | 0.01            | 0.04            | 0.06            | 0.07             | 0.04             | 0.05             |
| Al <sub>2</sub> O <sub>3</sub> | 1.57            | 1.94            | 1.90            | 1.20            | 2.23            | 1.55            | 1.60            | 1.97            | 2.21            | 1.78             | 1.28             | 1.55             |
| FeO                            | 2.11            | 2.26            | 2.22            | 2.13            | 2.27            | 2.15            | 2.19            | 2.15            | 2.31            | 2.22             | 2.03             | 2.19             |
| MnO                            | 0.06            | 0.08            | 0.06            | 0.08            | 0.09            | 0.07            | 0.06            | 0.08            | 0.07            | 0.07             | 0.05             | 0.07             |
| MgO                            | 17.32           | 17.34           | 17.38           | 17.66           | 16.86           | 17.45           | 17.16           | 17.35           | 17.39           | 17.07            | 17.45            | 17.16            |
| CaO                            | 23.14           | 22.85           | 23.07           | 23.38           | 23.21           | 23.32           | 23.33           | 22.72           | 22.53           | 23.18            | 23.44            | 23.47            |
| Na <sub>2</sub> O              | 0.59            | 0.59            | 0.63            | 0.53            | 0.67            | 0.60            | 0.58            | 0.71            | 0.65            | 0.58             | 0.52             | 0.47             |
| K <sub>2</sub> O               | 0.00            | 0.00            | 0.00            | 0.00            | 0.00            | 0.00            | 0.00            | 0.00            | 0.01            | 0.00             | 0.00             | 0.00             |
| Cr <sub>2</sub> O <sub>3</sub> | 0.55            | 0.72            | 0.65            | 0.39            | 0.81            | 0.55            | 0.55            | 0.89            | 0.99            | 0.70             | 0.33             | 0.44             |
| <b>Total</b>                   | 99.59           | 99.75           | 99.88           | 99.66           | 99.88           | 99.95           | 99.35           | 99.48           | 99.52           | 99.61            | 99.27            | 98.85            |
| <b>Grain size (µm)</b>         | 15              | 30              | 50              | 8               | 15              | 5               | 10              | 200             | 100             | 25               | 15               | 25               |

| Oxides (%)                     | Di <sub>13</sub> | Di <sub>14</sub> | Di <sub>15</sub> | Di <sub>16</sub> | Di <sub>17</sub> | Di <sub>18</sub> |
|--------------------------------|------------------|------------------|------------------|------------------|------------------|------------------|
| SiO <sub>2</sub>               | 54.14            | 53.27            | 53.12            | 53.96            | 54.10            | 53.55            |
| TiO <sub>2</sub>               | 0.04             | 0.02             | 0.01             | 0.03             | 0.01             | 0.02             |
| Al <sub>2</sub> O <sub>3</sub> | 1.36             | 1.73             | 1.93             | 1.69             | 1.29             | 1.82             |
| FeO                            | 2.20             | 2.26             | 2.30             | 2.29             | 2.13             | 2.19             |
| MnO                            | 0.06             | 0.07             | 0.07             | 0.07             | 0.07             | 0.05             |
| MgO                            | 17.23            | 17.38            | 17.33            | 17.36            | 17.55            | 17.22            |
| CaO                            | 23.34            | 23.33            | 23.00            | 23.29            | 23.81            | 23.23            |
| Na <sub>2</sub> O              | 0.49             | 0.51             | 0.54             | 0.59             | 0.51             | 0.65             |
| K <sub>2</sub> O               | 0.00             | 0.01             | 0.00             | 0.00             | 0.00             | 0.00             |
| Cr <sub>2</sub> O <sub>3</sub> | 0.38             | 0.65             | 0.73             | 0.59             | 0.42             | 0.68             |
| <b>Total</b>                   | 99.25            | 99.22            | 99.02            | 99.86            | 99.89            | 99.42            |
| <b>Grain size (µm)</b>         | 15               | 10               | 60               | 10               | 10               | 80               |



**Supplementary table 4** | Major-element compositions (oxides in weight percent) and grain size of spinel

(Spl) grains in the mylonites and ultramylonites. Por = porphyroclasts.

| Oxides (%)                     | Spl <sub>1</sub> | Spl <sub>2</sub> | Spl <sub>3</sub> | Spl <sub>4</sub> | Spl <sub>5</sub> | Spl <sub>6</sub> | Spl <sub>7</sub> | Spl <sub>8</sub> | Spl <sub>9</sub> | Spl <sub>10</sub> | Spl <sub>11</sub> | Spl <sub>12</sub> |
|--------------------------------|------------------|------------------|------------------|------------------|------------------|------------------|------------------|------------------|------------------|-------------------|-------------------|-------------------|
| SiO <sub>2</sub>               | 0.05             | 0.20             | 0.04             | 0.01             | 0.01             | 0.00             | 0.03             | 0.04             | 0.05             | 0.01              | 0.84              | 0.02              |
| TiO <sub>2</sub>               | 0.04             | 0.02             | 0.01             | 0.01             | 0.01             | 0.07             | 0.03             | 0.03             | 0.08             | 0.08              | 0.04              | 0.02              |
| Al <sub>2</sub> O <sub>3</sub> | 22.13            | 20.62            | 30.47            | 26.08            | 27.20            | 20.48            | 28.38            | 27.71            | 24.24            | 23.69             | 24.68             | 24.12             |
| Cr <sub>2</sub> O <sub>3</sub> | 43.16            | 41.45            | 36.02            | 41.28            | 39.80            | 45.57            | 36.96            | 36.07            | 41.91            | 42.48             | 39.30             | 42.71             |
| V <sub>2</sub> O <sub>3</sub>  | 0.15             | 0.16             | 0.18             | 0.18             | 0.19             | 0.15             | 0.17             | 0.16             | 0.15             | 0.16              | 0.15              | 0.19              |
| FeO                            | 17.19            | 19.84            | 17.60            | 14.78            | 16.85            | 16.05            | 17.92            | 18.06            | 15.72            | 15.69             | 17.12             | 15.73             |
| Fe <sub>2</sub> O <sub>3</sub> | 6.02             | 7.38             | 2.77             | 4.43             | 3.71             | 5.61             | 4.46             | 5.56             | 5.16             | 5.51              | 4.21              | 4.63              |
| MnO                            | 0.22             | 0.28             | 0.21             | 0.19             | 0.21             | 0.21             | 0.22             | 0.22             | 0.20             | 0.20              | 0.21              | 0.20              |
| MgO                            | 11.91            | 9.88             | 12.13            | 13.90            | 12.58            | 12.45            | 11.83            | 11.54            | 13.13            | 13.10             | 12.59             | 13.03             |
| NiO                            | 0.11             | 0.10             | 0.08             | 0.12             | 0.10             | 0.11             | 0.09             | 0.11             | 0.12             | 0.12              | 0.10              | 0.11              |
| ZnO                            | 0.25             | 0.24             | 0.49             | 0.17             | 0.25             | 0.13             | 0.42             | 0.39             | 0.13             | 0.16              | 0.17              | 0.19              |
| <b>Total</b>                   | 101.2            | 100.2            | 100.0            | 101.2            | 101.0            | 100.8            | 100.5            | 99.90            | 100.9            | 101.2             | 99.41             | 100.9             |
| <b>Grain size (µm)</b>         | 400              | 15               | 20               | Por              | 80               | Por              | 10               | 10               | 150              | 300               | 80                | 150               |

| Oxides (%)                     | Spl <sub>13</sub> | Spl <sub>14</sub> | Spl <sub>15</sub> | Spl <sub>16</sub> | Spl <sub>17</sub> | Spl <sub>18</sub> |
|--------------------------------|-------------------|-------------------|-------------------|-------------------|-------------------|-------------------|
| SiO <sub>2</sub>               | 0.01              | 0.07              | 0.03              | 0.00              | 0.00              | 0.02              |
| TiO <sub>2</sub>               | 0.02              | 0.02              | 0.05              | 0.06              | 0.04              | 0.05              |
| Al <sub>2</sub> O <sub>3</sub> | 26.10             | 30.72             | 21.46             | 21.28             | 23.35             | 21.61             |
| Cr <sub>2</sub> O <sub>3</sub> | 39.82             | 35.14             | 45.03             | 44.93             | 42.89             | 44.91             |
| V <sub>2</sub> O <sub>3</sub>  | 0.19              | 0.19              | 0.16              | 0.17              | 0.17              | 0.17              |
| FeO                            | 16.32             | 16.24             | 15.33             | 16.42             | 16.00             | 15.49             |
| Fe <sub>2</sub> O <sub>3</sub> | 4.91              | 3.87              | 5.32              | 5.28              | 5.12              | 5.22              |
| MnO                            | 0.21              | 0.19              | 0.20              | 0.22              | 0.20              | 0.20              |
| MgO                            | 12.75             | 13.18             | 13.05             | 12.30             | 12.75             | 12.96             |
| NiO                            | 0.12              | 0.12              | 0.12              | 0.10              | 0.11              | 0.11              |
| ZnO                            | 0.22              | 0.27              | 0.13              | 0.15              | 0.17              | 0.14              |
| <b>Total</b>                   | 100.7             | 100.0             | 100.9             | 100.1             | 100.8             | 100.9             |
| <b>Grain size (µm)</b>         | 100               | 10                | Por               | 10                | 200               | Por               |

**Supplementary Table 5** | Major-element compositions (oxides in weight percent) of amphibole grains

(Amp) in the mylonites and ultramylonites. Por = porphyroclasts.

| <b>Oxides (%)</b>                  | <b>Amp1</b> | <b>Amp2</b> | <b>Amp3</b> | <b>Amp4</b> | <b>Amp5</b> | <b>Amp6</b> | <b>Amp7</b> | <b>Amp8</b> | <b>Amp9</b> | <b>Amp10</b> |
|------------------------------------|-------------|-------------|-------------|-------------|-------------|-------------|-------------|-------------|-------------|--------------|
| <b>SiO<sub>2</sub></b>             | 44.81       | 43.92       | 44.28       | 43.81       | 44.00       | 44.16       | 44.27       | 43.89       | 44.40       | 43.62        |
| <b>TiO<sub>2</sub></b>             | 0.34        | 0.44        | 0.40        | 0.21        | 0.21        | 0.21        | 0.36        | 0.49        | 0.42        | 0.50         |
| <b>Al<sub>2</sub>O<sub>3</sub></b> | 13.11       | 13.42       | 13.23       | 13.05       | 13.01       | 12.85       | 12.99       | 13.39       | 12.64       | 13.22        |
| <b>Cr<sub>2</sub>O<sub>3</sub></b> | 1.56        | 2.17        | 1.90        | 2.11        | 2.04        | 2.24        | 1.83        | 1.91        | 1.58        | 1.91         |
| <b>Fe<sub>2</sub>O<sub>3</sub></b> | 3.73        | 3.95        | 3.91        | 3.82        | 3.75        | 3.86        | 4.08        | 3.91        | 4.22        | 4.22         |
| <b>FeO</b>                         | 0.00        | 0.00        | 0.00        | 0.00        | 0.00        | 0.00        | 0.00        | 0.00        | 0.00        | 0.00         |
| <b>MnO</b>                         | 0.06        | 0.05        | 0.04        | 0.05        | 0.06        | 0.06        | 0.01        | 0.04        | 0.04        | 0.05         |
| <b>MgO</b>                         | 19.02       | 18.42       | 18.73       | 18.93       | 18.90       | 18.76       | 18.75       | 18.19       | 18.68       | 18.37        |
| <b>CaO</b>                         | 12.04       | 11.99       | 12.03       | 11.95       | 11.93       | 11.87       | 12.14       | 12.04       | 11.96       | 12.10        |
| <b>Na<sub>2</sub>O</b>             | 2.77        | 2.88        | 2.85        | 3.01        | 3.24        | 3.28        | 3.12        | 2.85        | 2.88        | 2.94         |
| <b>K<sub>2</sub>O</b>              | 0.09        | 0.09        | 0.08        | 0.08        | 0.07        | 0.07        | 0.17        | 0.21        | 0.19        | 0.20         |
| <b>H<sub>2</sub>O</b>              | 2.13        | 2.12        | 2.12        | 2.11        | 2.11        | 2.12        | 2.12        | 2.11        | 2.11        | 2.11         |
| <b>Total</b>                       | 99.66       | 99.44       | 99.58       | 99.12       | 99.34       | 99.47       | 99.84       | 99.03       | 99.12       | 99.25        |

**Supplementary Table 6** | Pressure (P in kbar) and temperature (T in °C) data estimated in the mylonites and ultramylonites based on the major-elements compositions and geothermobarometers. Each number refers to the phase number shown in previous tables (from tables S1 to S5). The temperature data are summarized in the figure 3D of the paper. (1) = Ca in OPx at 5 kbar<sup>1</sup>; (2) = Ca in OPx at 8 kbar<sup>1</sup>; (3) = Al and Cr in OPx<sup>2</sup>; (4) = Two-pyroxene thermometer at 5 kbar<sup>1</sup> (TBKN); (5) = two-pyroxene thermometer at 8 kbar<sup>1</sup>. (6) = Olivine-spinel thermometer<sup>3</sup>. (7) = Two-pyroxene barometer<sup>4</sup>.

| Phase(s) | En <sub>1</sub> | En <sub>2</sub> | En <sub>3</sub> | En <sub>4</sub> | En <sub>5</sub> | En <sub>6</sub> | En <sub>7</sub> | En <sub>8</sub> | En <sub>9</sub> | En <sub>10</sub> | En <sub>11</sub> | En <sub>12</sub> | En <sub>13</sub> | En <sub>14</sub> | En <sub>15</sub> | En <sub>16</sub> | En <sub>17</sub> | En <sub>18</sub> |
|----------|-----------------|-----------------|-----------------|-----------------|-----------------|-----------------|-----------------|-----------------|-----------------|------------------|------------------|------------------|------------------|------------------|------------------|------------------|------------------|------------------|
| T (1)    | 1016.9          | 923.4           | 866.7           | 871.6           | 855.2           | 865.5           | 777.2           | 742.0           | 726.0           | 740.5            | 856.3            | 596.7            | 559.5            | 586.0            | 595.2            | 742.5            | 811.3            | 752.1            |
| T (2)    | 1032.5          | 937.8           | 880.5           | 885.4           | 868.9           | 879.3           | 789.9           | 754.2           | 738.1           | 752.8            | 870.0            | 607.3            | 569.6            | 596.4            | 605.7            | 754.8            | 824.4            | 764.4            |
| T (3)    | 932.05          | 823.6           | 858.1           | 873.9           | 723.8           | 713.7           | 683.9           | 613.3           | 610.9           | 510.9            | 950.2            | 624.4            | 537.6            | 614.1            | 615.1            | 617.4            | 754.1            | 635.6            |

| Phase(s) | En <sub>19</sub> | En <sub>20</sub> | En <sub>21</sub> | En <sub>22</sub> | En <sub>23</sub> | En <sub>24</sub> | En <sub>25</sub> | En <sub>26</sub> | En <sub>27</sub> | En <sub>28</sub> | En <sub>29</sub> | En <sub>30</sub> | En <sub>31</sub> | En <sub>32</sub> | En <sub>33</sub> | En <sub>34</sub> | En <sub>35</sub> | En <sub>36</sub> |
|----------|------------------|------------------|------------------|------------------|------------------|------------------|------------------|------------------|------------------|------------------|------------------|------------------|------------------|------------------|------------------|------------------|------------------|------------------|
| T (1)    | 804.5            | 776.2            | 838.4            | 759.6            | 766.5            | 847.3            | 869.6            | 905.8            | 790.6            | 750.4            | 821.5            | 1018.0           | 780.4            | 818.9            | 812.2            | 754.8            | 734.8            | 731.0            |
| T (2)    | 817.5            | 788.7            | 851.9            | 772.1            | 779.0            | 860.8            | 883.4            | 920.0            | 803.5            | 762.8            | 834.7            | 1033.6           | 793.2            | 832.1            | 825.3            | 767.2            | 747.0            | 743.1            |
| T (3)    | 691.0            | 616.2            | 683.3            | 644.6            | 672.3            | 1054.9           | 1009.9           | 714.2            | 641.7            | 746.1            | 976.4            | 1047.4           | 978.6            | 720.6            | 715.4            | 619.9            | 654.0            | 627.2            |

| Phase(s) | En <sub>37</sub> | En <sub>38</sub> | En <sub>39</sub> | En <sub>40</sub> | En <sub>41</sub> | En <sub>42</sub> | En <sub>43</sub> | En <sub>44</sub> | En <sub>45</sub> | En <sub>46</sub> | En <sub>47</sub> | En <sub>48</sub> | En <sub>49</sub> | Di <sub>1</sub> /En <sub>26</sub> | Di <sub>2</sub> /En <sub>27</sub> | Di <sub>3</sub> /En <sub>32</sub> | Di <sub>4</sub> /En <sub>34</sub> | Di <sub>5</sub> /En <sub>35</sub> |       |       |
|----------|------------------|------------------|------------------|------------------|------------------|------------------|------------------|------------------|------------------|------------------|------------------|------------------|------------------|-----------------------------------|-----------------------------------|-----------------------------------|-----------------------------------|-----------------------------------|-------|-------|
| T (1)    | 791.5            | 869.5            | 887.6            | 759.7            | 753.9            | 858.0            | 804.7            | 737.8            | 742.9            | 800.3            | 708.4            | 886.5            | 830.5            |                                   |                                   |                                   |                                   |                                   |       |       |
| T (2)    | 804.4            | 883.3            | 901.6            | 772.2            | 766.3            | 871.7            | 817.7            | 750.0            | 755.2            | 813.3            | 720.3            | 900.5            | 843.8            |                                   |                                   |                                   |                                   |                                   |       |       |
| T (3)    | 730.6            | 883.0            | 840.4            | 601.3            | 728.8            | 760.8            | 724.7            | 586.5            | 690.7            | 709.4            | 647.7            | 1017.2           | 841.9            |                                   |                                   |                                   |                                   |                                   |       |       |
| T (4)    |                  |                  |                  |                  |                  |                  |                  |                  |                  |                  |                  |                  |                  |                                   |                                   | 804.6                             | 852.3                             | 806.7                             | 769.2 | 759.9 |
| T (5)    |                  |                  |                  |                  |                  |                  |                  |                  |                  |                  |                  |                  |                  |                                   |                                   | 809.1                             | 857.1                             | 811.3                             | 773.5 | 764.3 |

| Phase(s) | Di <sub>6</sub> /En <sub>36</sub> | Di <sub>7</sub> /En <sub>37</sub> | Di <sub>8</sub> /En <sub>42</sub> | Di <sub>9</sub> /En <sub>41</sub> | Di <sub>10</sub> /En <sub>40</sub> | Di <sub>11</sub> /En <sub>47</sub> | Di <sub>12</sub> /En <sub>45</sub> | Di <sub>13</sub> /En <sub>44</sub> | Di <sub>14</sub> /En <sub>10</sub> | Di <sub>15</sub> /En <sub>6</sub> | Di <sub>16</sub> /En <sub>18</sub> | Di <sub>17</sub> /En <sub>20</sub> | Di <sub>18</sub> /En <sub>21</sub> | Ol <sub>1</sub> /Sp <sub>1</sub> | Ol <sub>2</sub> /Sp <sub>2</sub> | Ol <sub>3</sub> /Sp <sub>2</sub> | Ol <sub>4</sub> /Sp <sub>2</sub> | Ol <sub>5</sub> /Sp <sub>3</sub> |       |       |
|----------|-----------------------------------|-----------------------------------|-----------------------------------|-----------------------------------|------------------------------------|------------------------------------|------------------------------------|------------------------------------|------------------------------------|-----------------------------------|------------------------------------|------------------------------------|------------------------------------|----------------------------------|----------------------------------|----------------------------------|----------------------------------|----------------------------------|-------|-------|
| T (4)    | 766.8                             | 740.2                             | 827.8                             | 870.4                             | 785.6                              | 742.8                              | 717.5                              | 768.9                              | 752.2                              | 800.8                             | 786.7                              | 866.4                              | 743.1                              |                                  |                                  |                                  |                                  |                                  |       |       |
| T (5)    | 771.1                             | 744.5                             | 832.4                             | 875.2                             | 790.1                              | 747                                | 721.6                              | 773.3                              | 756.5                              | 805.4                             | 791.2                              | 871.3                              | 747.3                              |                                  |                                  |                                  |                                  |                                  |       |       |
| T (6)    |                                   |                                   |                                   |                                   |                                    |                                    |                                    |                                    |                                    |                                   |                                    |                                    |                                    |                                  |                                  | 749.0                            | 656.0                            | 652.0                            | 657.0 | 696.0 |

| Phase(s) | Ol <sub>6</sub> /Sp <sub>2</sub> | Ol <sub>7</sub> /Sp <sub>3</sub> | Ol <sub>8</sub> /Sp <sub>3</sub> | Ol <sub>9</sub> /Sp <sub>4</sub> | Ol <sub>10</sub> /Sp <sub>5</sub> | Ol <sub>11</sub> /Sp <sub>6</sub> | Ol <sub>12</sub> /Sp <sub>6</sub> | Ol <sub>13</sub> /Sp <sub>6</sub> | Ol <sub>14</sub> /Sp <sub>7</sub> | Ol <sub>15</sub> /Sp <sub>8</sub> | Ol <sub>16</sub> /Sp <sub>9</sub> | Ol <sub>17</sub> /Sp <sub>10</sub> | Ol <sub>18</sub> /Sp <sub>11</sub> | Ol <sub>19</sub> /Sp <sub>12</sub> | Ol <sub>20</sub> /Sp <sub>13</sub> | Ol <sub>21</sub> /Sp <sub>14</sub> | Ol <sub>22</sub> /Sp <sub>15</sub> | Ol <sub>23</sub> /Sp <sub>16</sub> | Ol <sub>24</sub> /Sp <sub>17</sub> | Ol <sub>25</sub> /Sp <sub>18</sub> |
|----------|----------------------------------|----------------------------------|----------------------------------|----------------------------------|-----------------------------------|-----------------------------------|-----------------------------------|-----------------------------------|-----------------------------------|-----------------------------------|-----------------------------------|------------------------------------|------------------------------------|------------------------------------|------------------------------------|------------------------------------|------------------------------------|------------------------------------|------------------------------------|------------------------------------|
| T (6)    | 657.0                            | 696.0                            | 691.0                            | 821.0                            | 750.0                             | 811.0                             | 800.0                             | 802.0                             | 660.0                             | 641.0                             | 745.0                             | 764.0                              | 726.0                              | 796.0                              | 743.0                              | 707.0                              | 827.0                              | 780.0                              | 772.0                              | 822.0                              |

| Phase(s) | Di <sub>1</sub> /En <sub>26</sub> | Di <sub>2</sub> /En <sub>27</sub> | Di <sub>3</sub> /En <sub>32</sub> | Di <sub>4</sub> /En <sub>34</sub> | Di <sub>5</sub> /En <sub>35</sub> | Di <sub>6</sub> /En <sub>36</sub> | Di <sub>7</sub> /En <sub>37</sub> | Di <sub>8</sub> /En <sub>42</sub> | Di <sub>9</sub> /En <sub>41</sub> | Di <sub>10</sub> /En <sub>40</sub> | Di <sub>11</sub> /En <sub>47</sub> | Di <sub>12</sub> /En <sub>45</sub> | Di <sub>13</sub> /En <sub>44</sub> | Di <sub>14</sub> /En <sub>10</sub> | Di <sub>15</sub> /En <sub>6</sub> | Di <sub>16</sub> /En <sub>18</sub> | Di <sub>17</sub> /En <sub>20</sub> | Di <sub>18</sub> /En <sub>21</sub> |
|----------|-----------------------------------|-----------------------------------|-----------------------------------|-----------------------------------|-----------------------------------|-----------------------------------|-----------------------------------|-----------------------------------|-----------------------------------|------------------------------------|------------------------------------|------------------------------------|------------------------------------|------------------------------------|-----------------------------------|------------------------------------|------------------------------------|------------------------------------|
| P (7)    | 4.8                               | 9.0                               | 6.9                               | 8.8                               | 10.6                              | 10.7                              | 6.5                               | 5.9                               | 11.8                              | 9.0                                | 10.8                               | 7.7                                | 9.6                                | 9.2                                | 4.9                               | 8.9                                | 6.1                                | 5.1                                |

## Supplementary References

1. Brey, G. P., & Köhler, T. Geothermobarometry in four-phase lherzolites II. New thermobarometers, and practical assessment of existing thermobarometers. *J. Petrol.* **31**, 1353-1378 (1990).
2. Witt-Eickschen, G. & Seck, H. A. Solubility of Ca and Al in orthopyroxene from spinel peridotite: an improved version of an empirical geothermometer. *Contrib. Min. Petrol.* **106**, 431-439 (1991).
3. Jianping, L., Kornprobst, J., Vielzeuf, D. & Fabriès, J. An improved experimental calibration of the olivine-spinel geothermometer. *Chinese J. Geochem.* **14**, 68-77 (1995).
4. Putirka, K. D. Thermometers and barometers for volcanic systems. *Rev. Min. Geochem.* **69**, 61-120 (2008).
